# Supplementary material
Source: PubMed Central journal article supplement (PMC1276708)
Supplement: 7600825s1.pdf [file 7600825s1.pdf]

## XI177 cells

## HeLa cells

Nup155

overlay

Nup155

overlay

pi  $\alpha$ Nup155

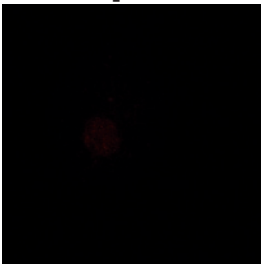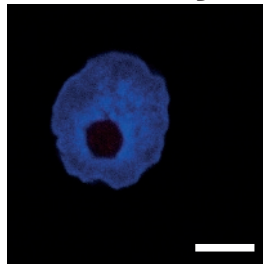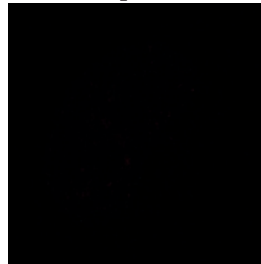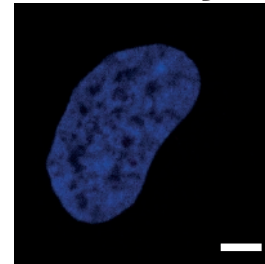

$\alpha$ Nup155

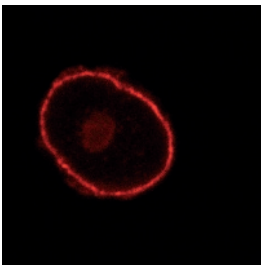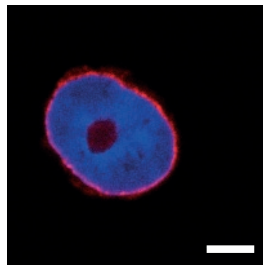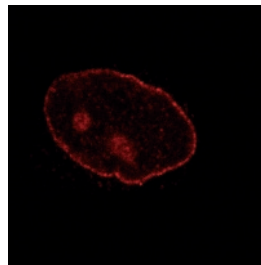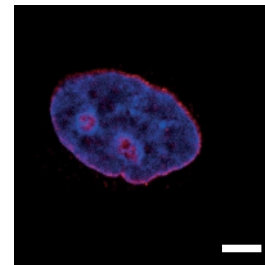

### Supplementary Figure 1

Immunofluorescence of Nup155 on *Xenopus* XI177 and human HeLa cells.

Cells were pre-extracted with 0.1% Triton X-100 before fixation in paraformaldehyde. Immunofluorescence was performed with Nup155 pre-immune serum (top row) and anti-Nup155 serum (bottom row). In the overlaid image chromatin was stained with DAPI (blue). Bar, 5 $\mu$ m.
