# Supplementary material
Source: PubMed Central journal article supplement (PMC1276708)
Supplement: 7600825s2.pdf [file 7600825s2.pdf]

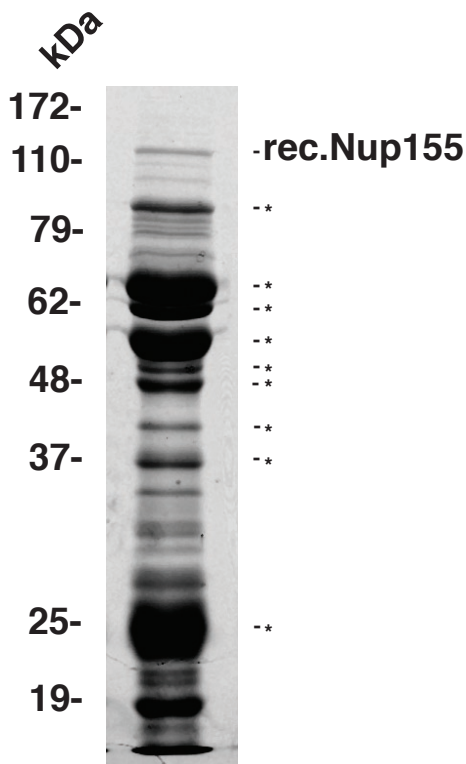

## Supplementary Figure 2

### Recombinant Nup155.

Recombinant Nup155 used for complementation was purified from *E. coli* and stained by Coomassie blue after SDS-PAGE. The major contaminants (asterisks) were sequenced by mass spectrometry and are not Nup155 degradation products.
