# Supplementary material
Source: PubMed Central journal article supplement (PMC1276708)
Supplement: 7600825s3.pdf [file 7600825s3.pdf]

**A****GFP-Nup45/Nup58**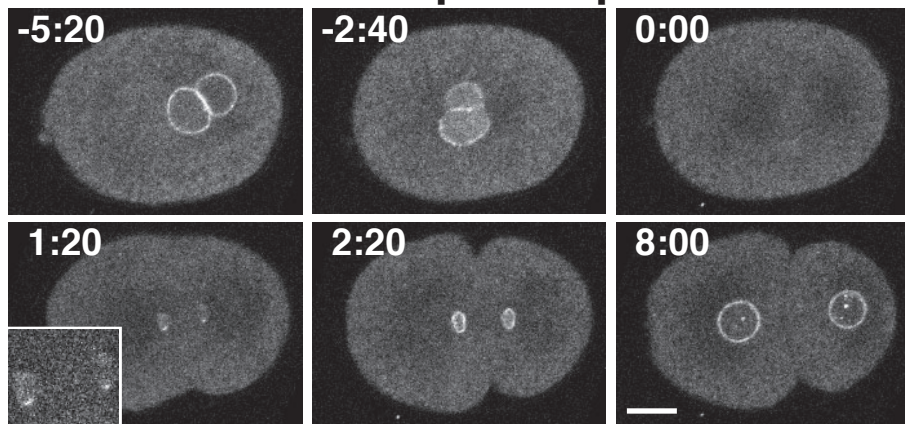**B****GFP-Nup35**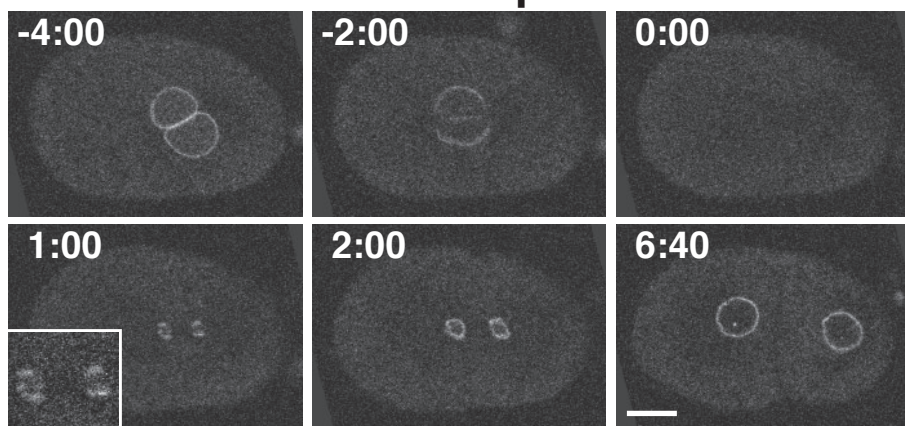**Supplementary Figure 3**

**Dynamics of GFP-Nup45/Nup58 and GFP-Nup35.** Still images from time-lapse recordings of *C. elegans* embryos expressing GFP-Nup45/Nup58 (A) and GFP-Nup35 (B). Similar time points are presented as for GFP-Nup155 in Figure 7A. Inserts show a magnification of initial recruitment to the reforming nuclei during anaphase. Bar, 10  $\mu\text{m}$ .
